# Supplementary material for: Electrospun poly(lactic acid) fibers containing novel chlorhexidine particles with sustained antibacterial activity
Source: Royal Society of Chemistry journal article supplement (doi:10.1039/c6bm00646a), 2016-11-25
Supplement: c6bm00646a1.pdf [file c6bm00646a1.pdf]

**Electronic Supplementary Information**

**Electrospun poly (lactic acid) fibers containing novel  
chlorhexidine particles with sustained antibacterial activity**

*Dong Luo<sup>a\*</sup>, Xi Zhang<sup>a</sup>, Saroash Shahid<sup>b</sup>, Michael J. Cattell<sup>b</sup>, David J. Gould<sup>c</sup>, Gleb B. Sukhorukov<sup>a</sup>*

<sup>a</sup>School of Engineering and Materials Science, Queen Mary University of London, E1 4NS, United Kingdom

<sup>b</sup>Barts and The London School of Medicine and Dentistry, Queen Mary University of London, E1 2AD, United Kingdom

<sup>c</sup>William Harvey Research Institute, Queen Mary University of London, EC1M 6BQ, United Kingdom

\* Corresponding author.

Email address: [d.luo@qmul.ac.uk](mailto:d.luo@qmul.ac.uk) (D. Luo)

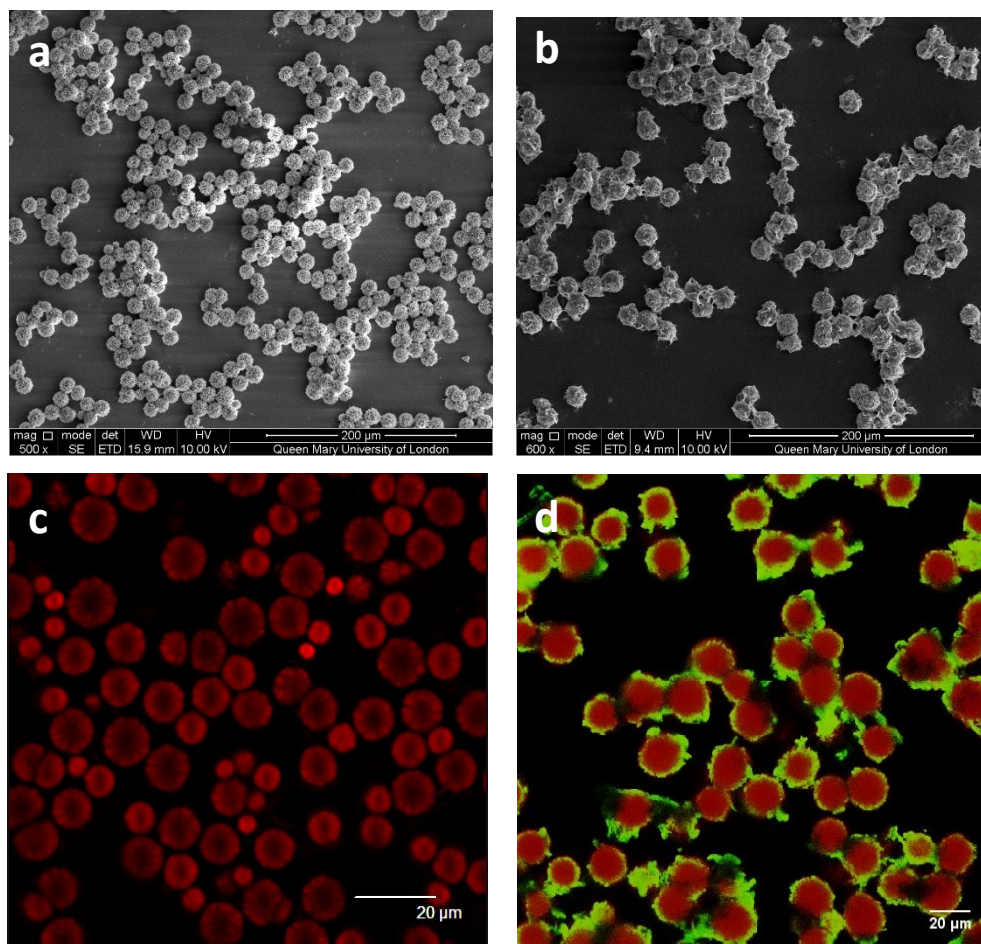

e

**Fig. S1.** Chlorhexidine particles. SEM images of (a) chlorhexidine particles without coating; (b) chlorhexidine particles which was covered by PAH/PSS shells; confocal images of (c) chlorhexidine particles labelled with RhB; (d) coated chlorhexidine particles with one of the PAH layers labelled with FITC; (e) diameter distribution of the chlorhexidine particles.

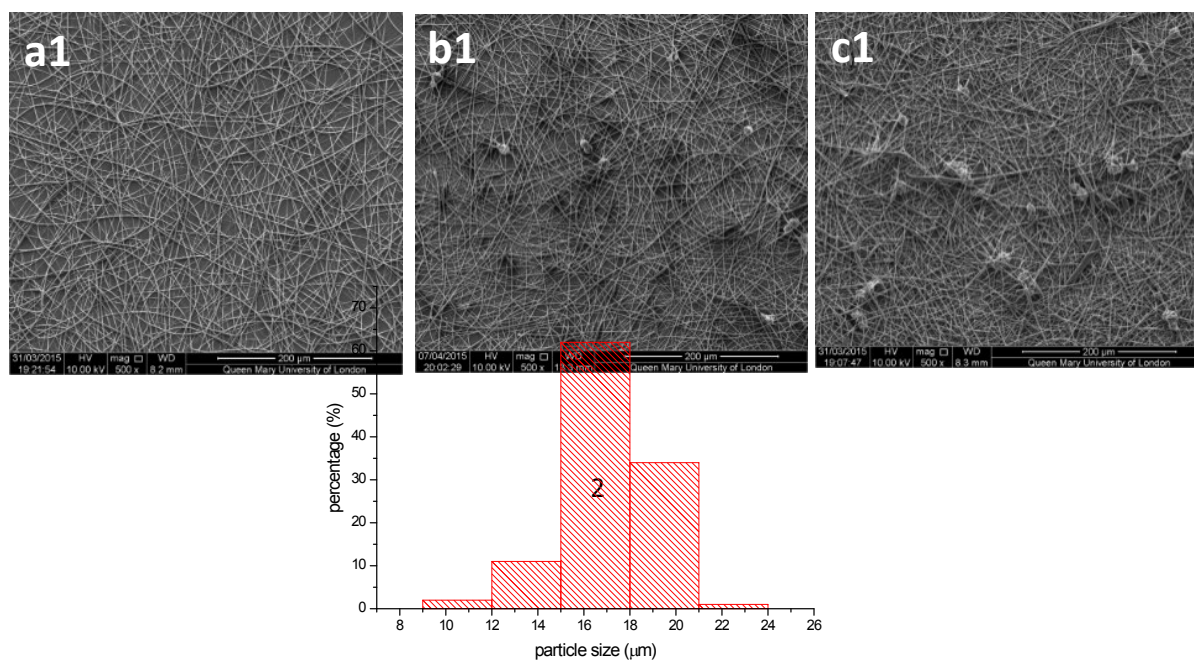

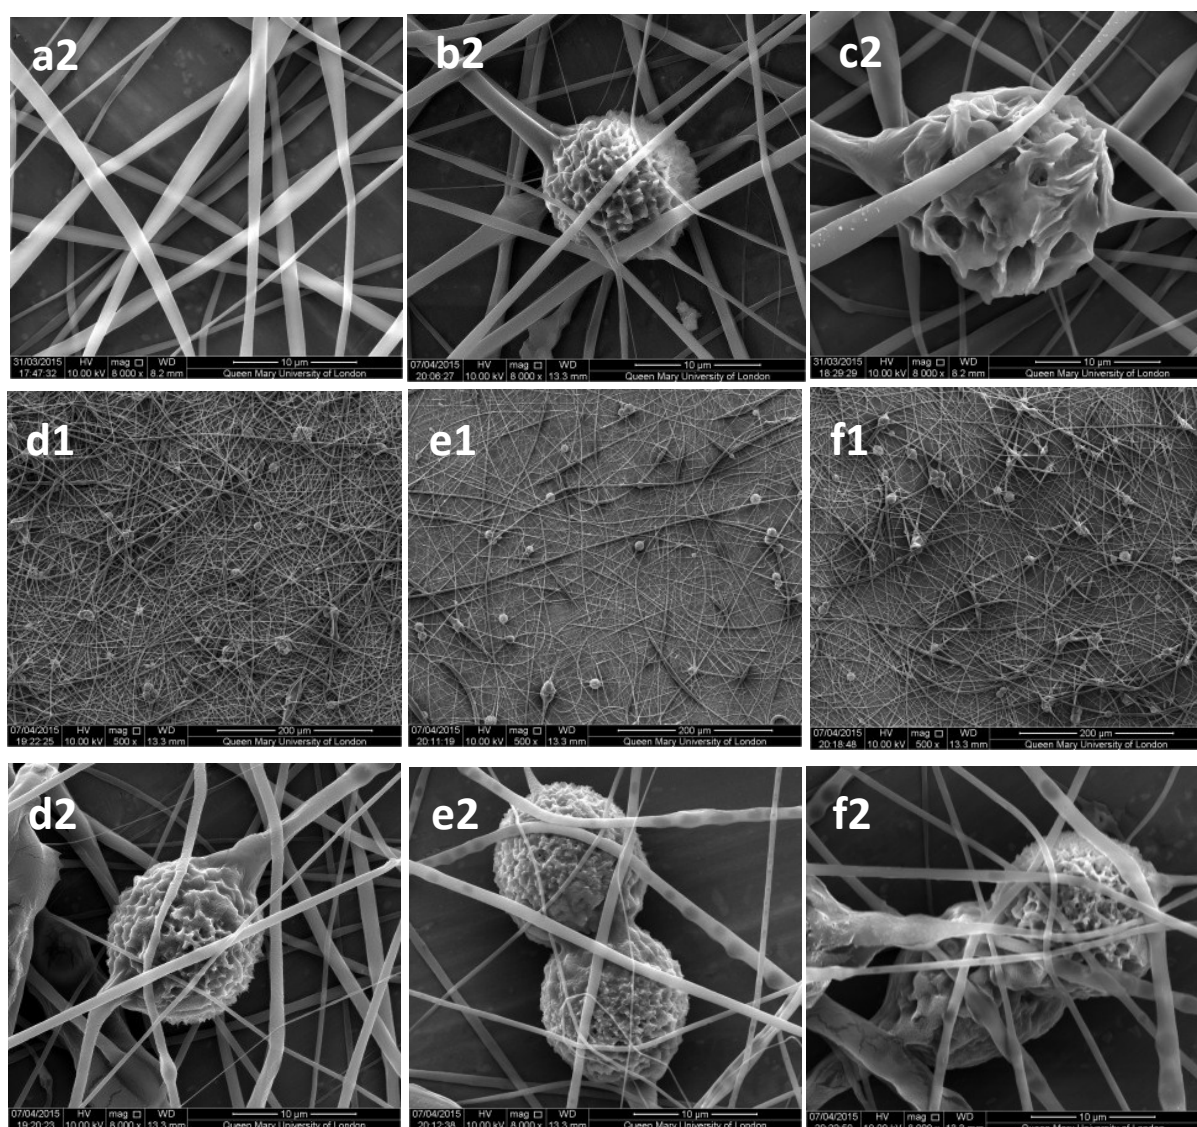

**Fig. S2.** SEM images of electrospun fibers. (a) PLA fiber control; and PLA fibers containing (b) 5 %; (c) 10 %; (d) 15 %; (e) 20 %; (f) 25 % wt/wt chlorhexidine particles.

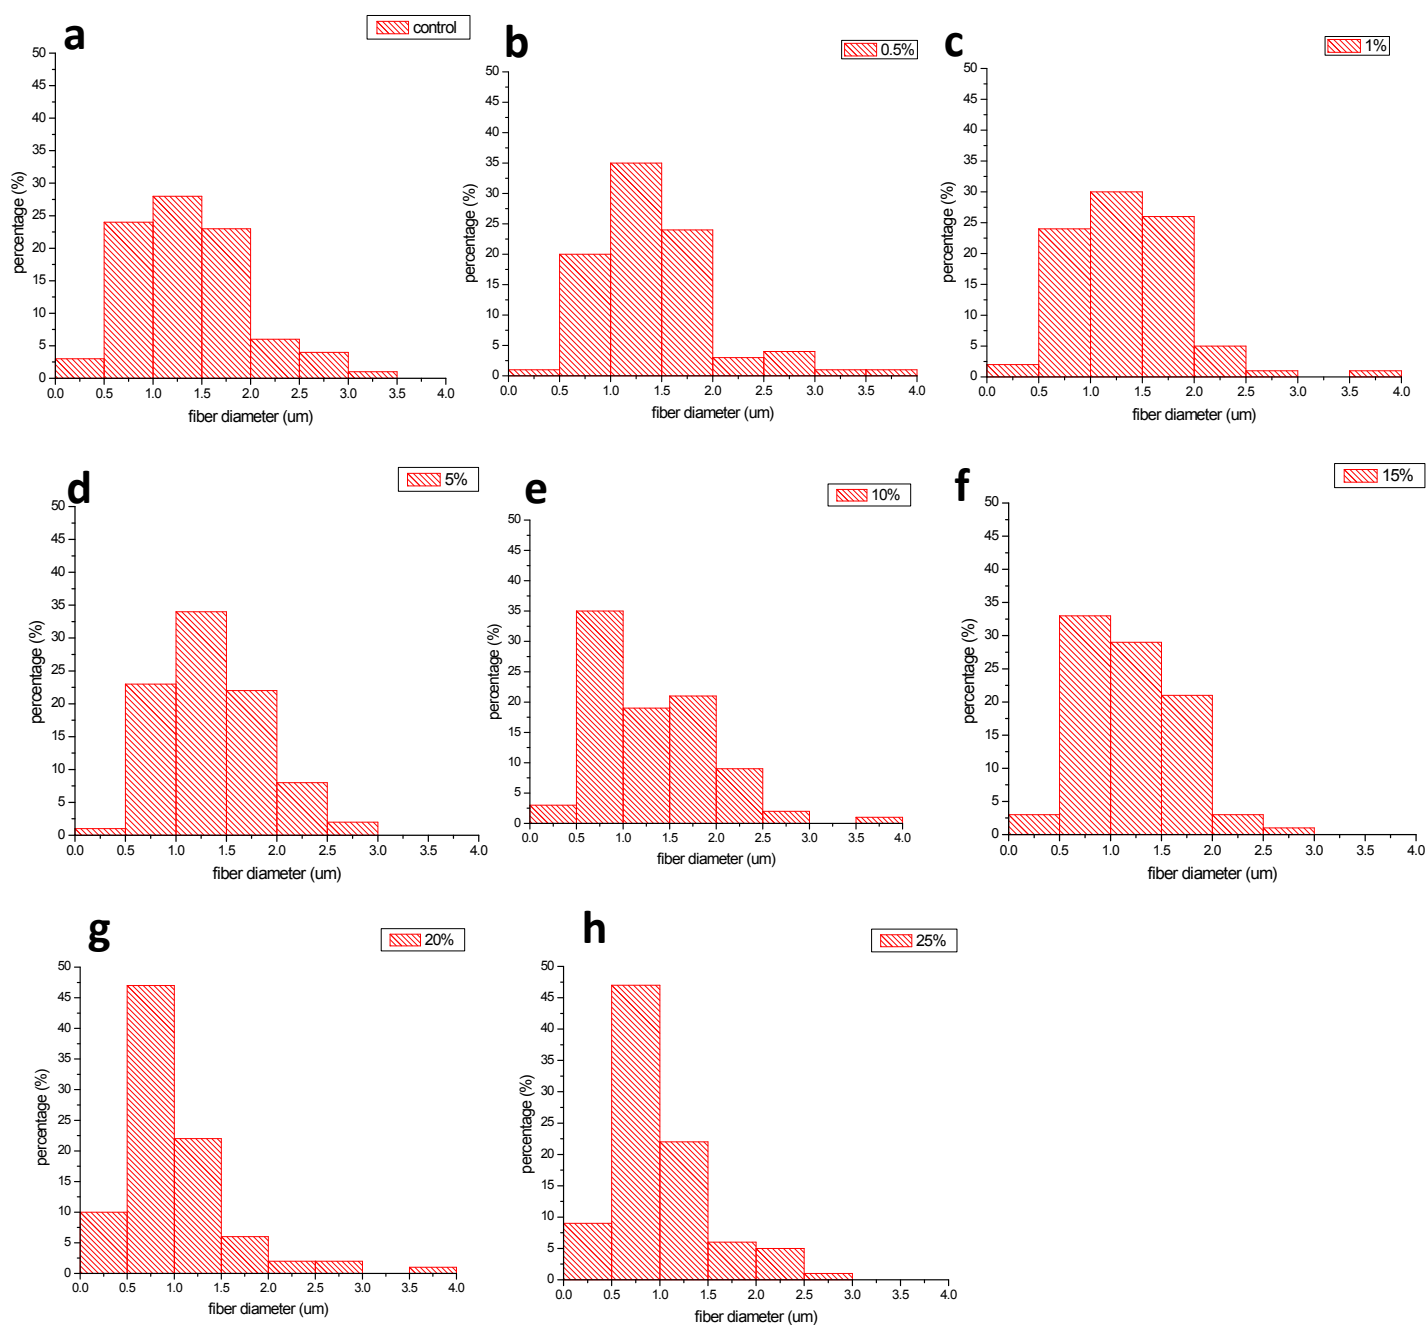

**Fig. S3.** Diameters distribution of electrospun fibers. (a) PLA fibers as control; and PLA fibers containing (b) 0.5 % wt/wt; (c) 1 % wt/wt; (d) 5 % wt/wt; (e) 10 % wt/wt; (f) 15 % wt/wt (g) 20 % wt/wt; (h) 25 % wt/wt chlorhexidine spheres.

Table S1 Tensile properties of PLA fibers containing different amount of chlorhexidine.

| Sample name        | Young's modulus (MPa)* | Elongation at break (%) | Strength (MPa) |
|--------------------|------------------------|-------------------------|----------------|
| PLA fibre          | 31.32±5.85             | 30.43±2.38              | 1.55±0.14      |
| PLA fibre-0.5% CHX | 25.63±3.06             | 11.89±1.73              | 0.70±0.05      |
| PLA fibre-1.0% CHX | 10.47±1.14             | 13.84±0.41              | 0.37±0.02      |
| PLA fibre-5.0% CHX | 11.75±1.81             | 13.40±0.63              | 0.36±0.02      |

\* Young's modulus was calculated by the slope of the stress-strain curve at 1% strain

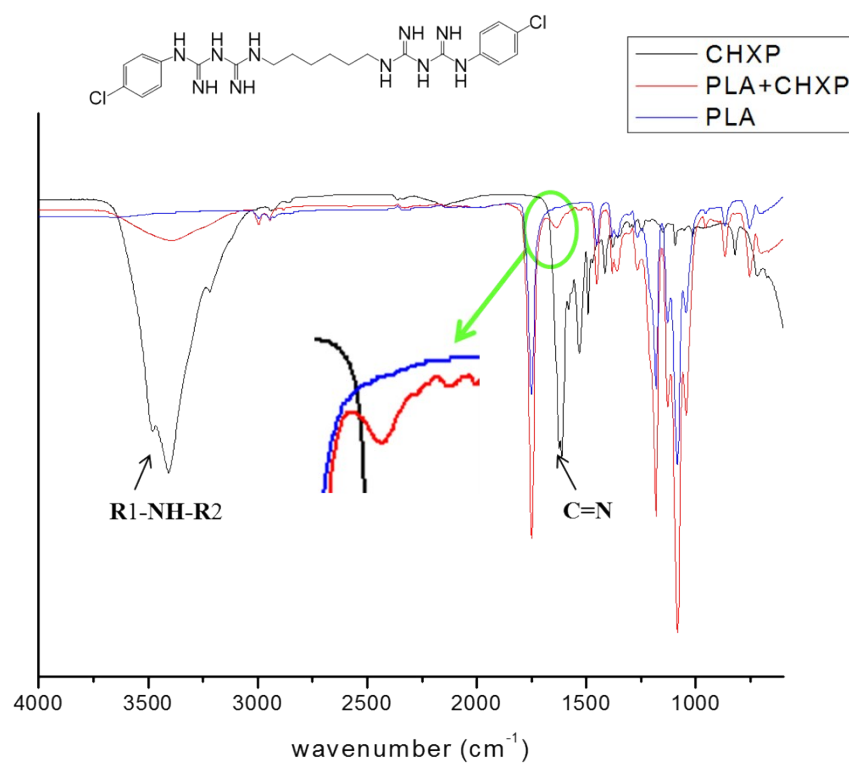

**Fig. S4.** FTIR spectrum of (blue) PLA fibers as a control; (black) chlorhexidine particles and (red) PLA fibers containing 5 % wt/wt chlorhexidine particles.



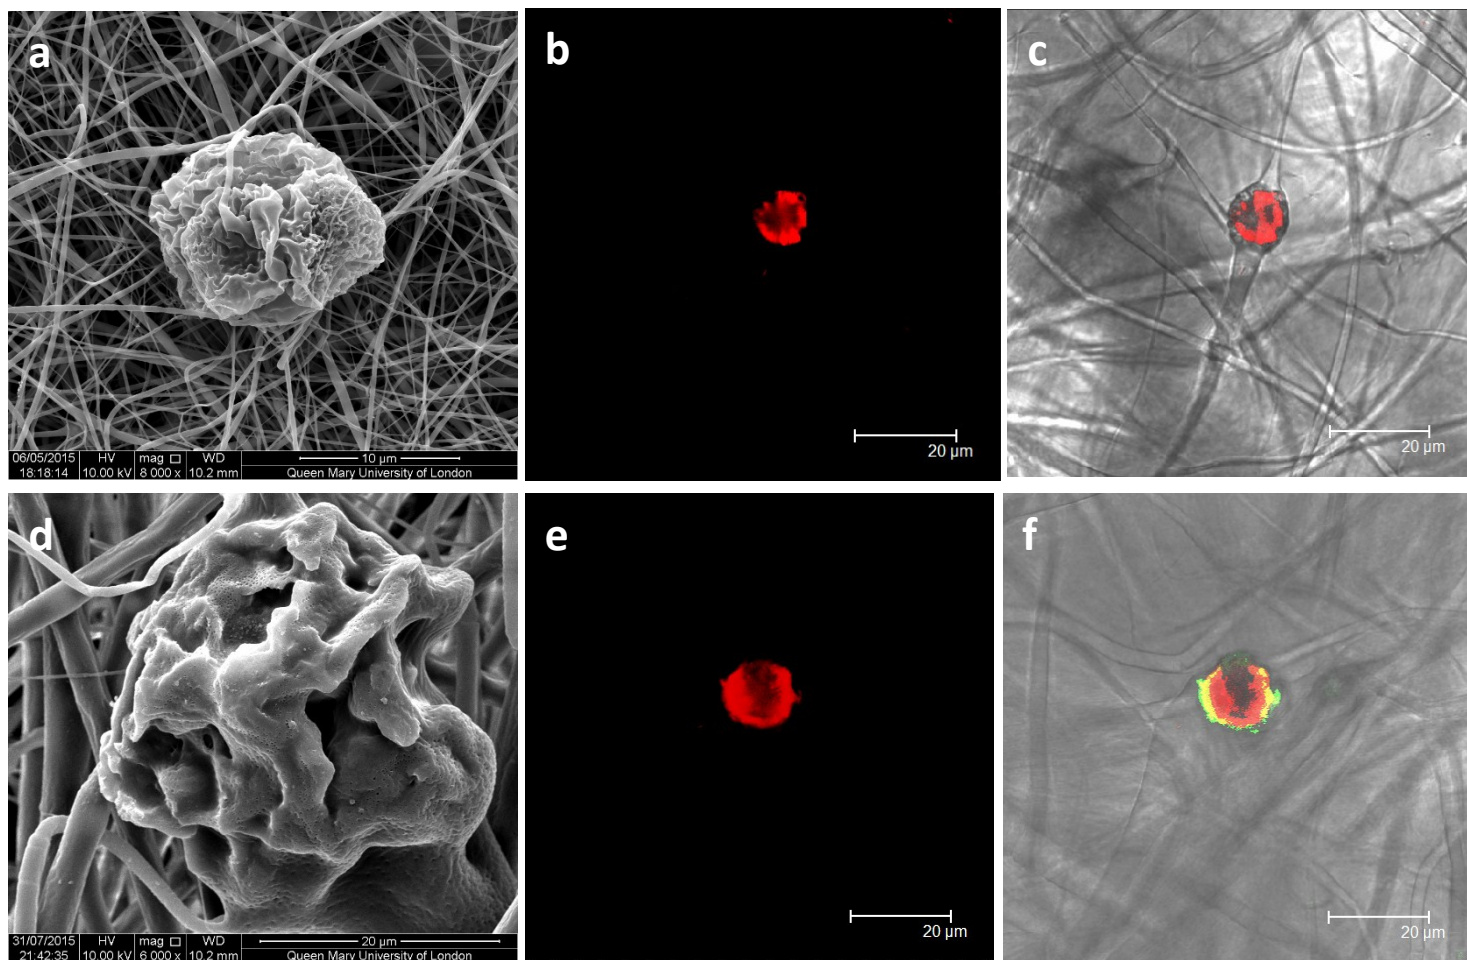

**Fig. S5.** SEM and confocal images of electrospun fibers after the 650 h release test in PBS. (a, d) SEM images of uncoated chlorhexidine particle and encapsulated chlorhexidine in the fibers; confocal images of uncoated chlorhexidine particle and encapsulated chlorhexidine in the fibers at (b, e) red channel and (c, f) overlapped transmitted channel.

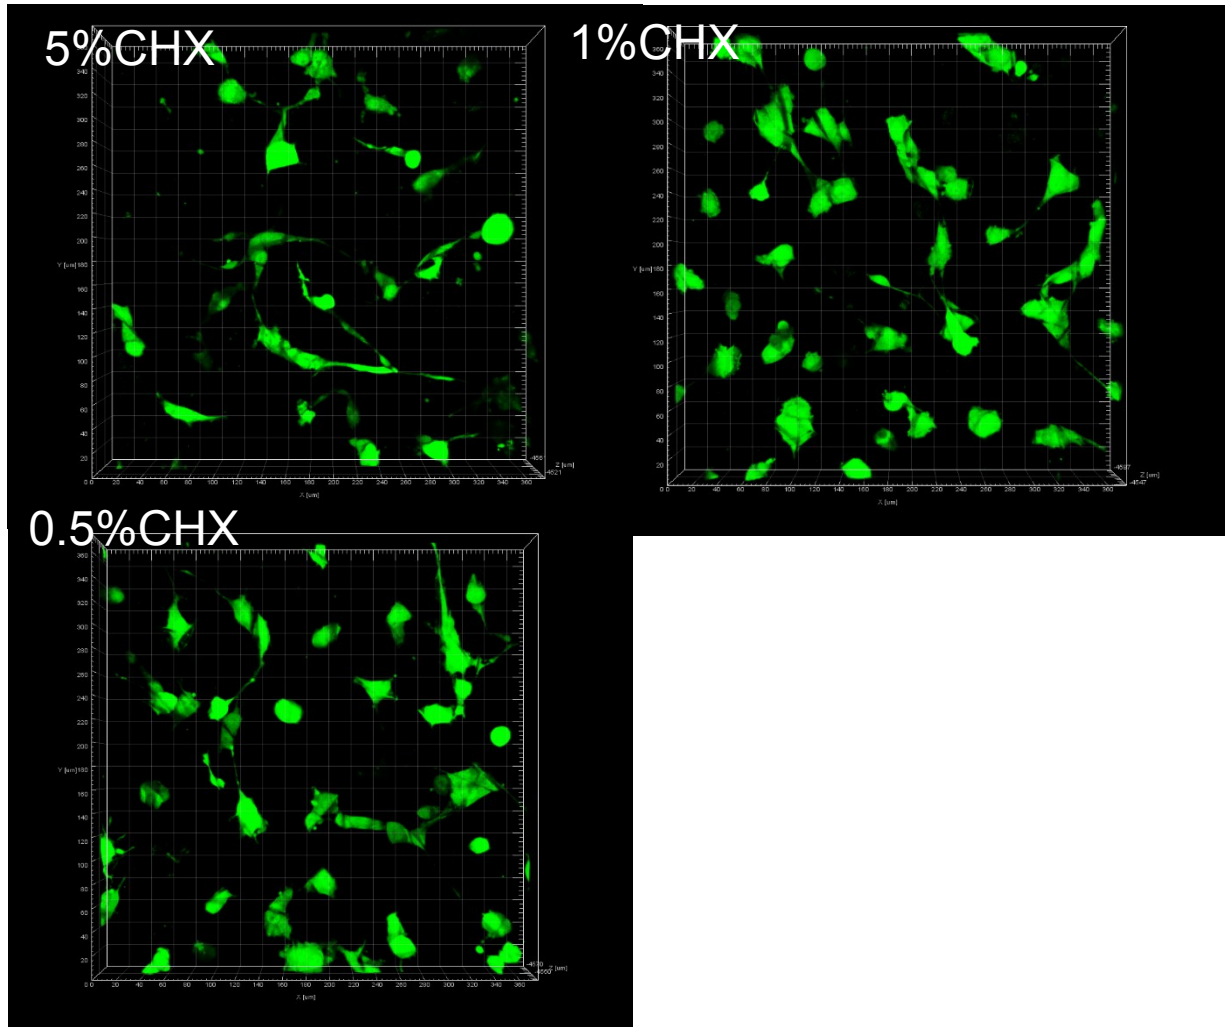

**Fig. S6.** 3D images of fibroblast adhesion on the fibers containing the encapsulated chlorhexidine, with chlorhexidine loading ratio of 0.1, 0.5, 1 and 5 % wt/wt. 3T3 cells were engineered to express EGFP and cells were cultured on fibers for 24 h.



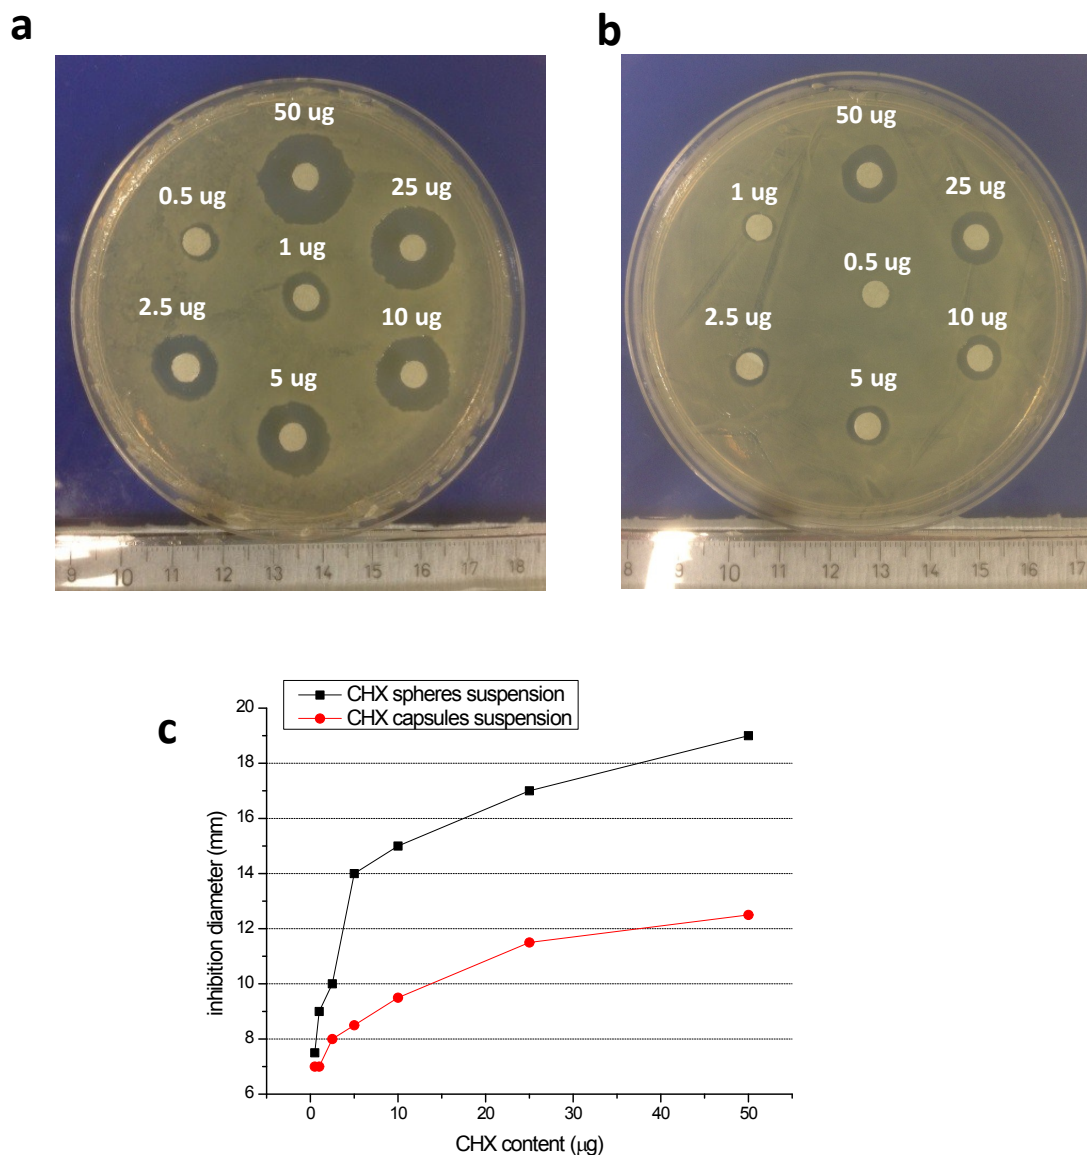

**Fig. S7.** Inhibition of (a) chlorhexidine particles and (b) encapsulated particles against *E. coli*. (c) comparison of inhibition diameters as a function of chlorhexidine concentration; 10 µl CHX solutions with different amount of CHX content (50, 25, 10, 5, 2.5, 1, 0.5 µg) were added to filters.
